# Supplementary material for: Protooncogenic Role of ARHGAP11A and ARHGAP11B in Invasive Ductal Carcinoma: Two Promising Breast Cancer Biomarkers
Source: Hindawi journal article supplement (doi:10.1155/2023/8236853), 2023-01-01

**RNAseq ID:** ARHGAP11A =  
**Survival:** OS  
**Auto select best cutoff:** checked  
**Follow up threshold:** all  
**Censore at threshold:** checked  
**Compute median over entire database:** false  
**Cutoff value used in analysis:** -0.84  
**Expression range of the probe:** -3 - 2  
**Probe set option:** user selected probe set  
**Invert HR values below 1:** not checked

**Restrictions**

Lymph node status: all  
 ER status: all  
 PGR status: all  
 HER2 status: all  
 KI67 status: all  
 Nottingham histologic grade: all  
 PAM50 subtype: all

**Cohorts**

Endocrine treated: all  
 Chemo treated: all

**Results**

**P value:** 0.0012  
**FDR:** over 50%

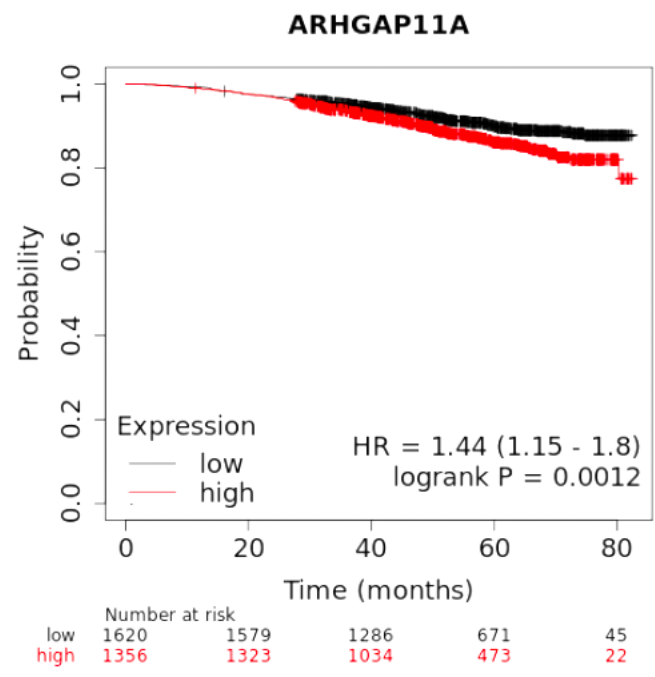

**RNAseq ID:** ARHGAP11A  
**Survival:** OS  
**Auto select best cutoff:** checked  
**Follow up threshold:** all  
**Censore at threshold:** checked  
**Compute median over entire database:** false  
**Cutoff value used in analysis:** -1.08  
**Expression range of the probe:** -3 - 1  
**Probe set option:** user selected probe set  
**Invert HR values below 1:** not checked

### Restrictions

Lymph node status: all  
 ER status: all  
 PGR status: all  
 HER2 status: all  
 KI67 status: all  
 Nottingham histologic grade: all  
 PAM50 subtype: Normal

### Cohorts

Endocrine treated: all  
 Chemo treated: all

### Results

**P value:** 0.4958  
**FDR:** 100%

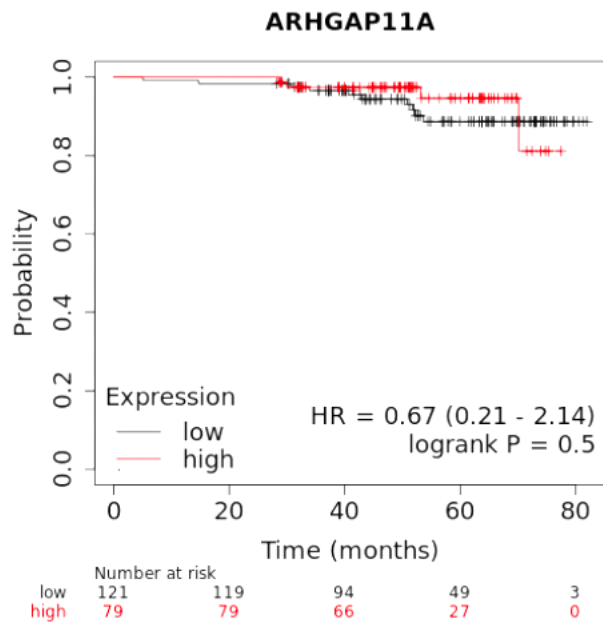

**RNAseq ID:** ARHGAP11A =  
**Survival:** OS  
**Auto select best cutoff:** checked  
**Follow up threshold:** all  
**Censore at threshold:** checked  
**Compute median over entire database:** false  
**Cutoff value used in analysis:** -0.24  
**Expression range of the probe:** -3 - 2  
**Probe set option:** user selected probe set  
**Invert HR values below 1:** not checked

### Restrictions

Lymph node status: all  
 ER status: all  
 PGR status: all  
 HER2 status: all  
 KI67 status: all  
 Nottingham histologic grade: all  
 PAM50 subtype: Basal

### Cohorts

Endocrine treated: all  
 Chemo treated: all

### Results

**P value:** 0.2448  
**FDR:** 100%

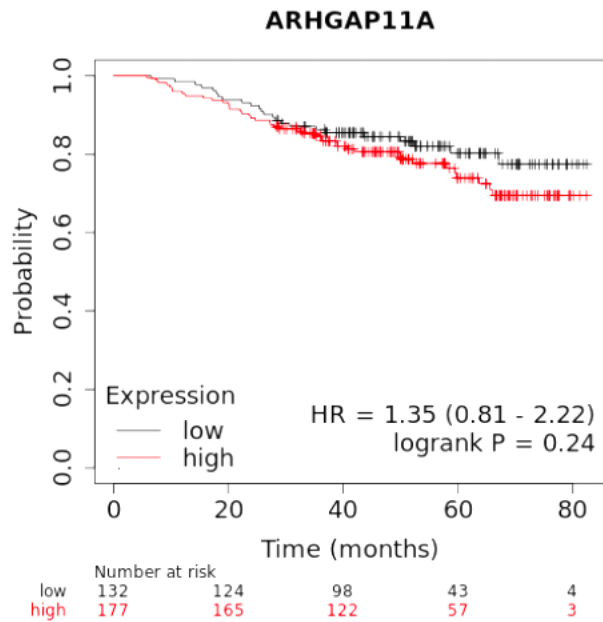

**RNAseq ID:** ARHGAP11A =  
**Survival:** OS  
**Auto select best cutoff:** checked  
**Follow up threshold:** all  
**Censore at threshold:** checked  
**Compute median over entire database:** false  
**Cutoff value used in analysis:** -1.65  
**Expression range of the probe:** -3 - 1  
**Probe set option:** user selected probe set  
**Invert HR values below 1:** not checked

**Restrictions**

Lymph node status: all  
 ER status: all  
 PGR status: all  
 HER2 status: all  
 KI67 status: all  
 Nottingham histologic grade: all  
 PAM50 subtype: LuminalA

**Cohorts**

Endocrine treated: all  
 Chemo treated: all

**Results**

**P value:** 0.3061  
**FDR:** 100%

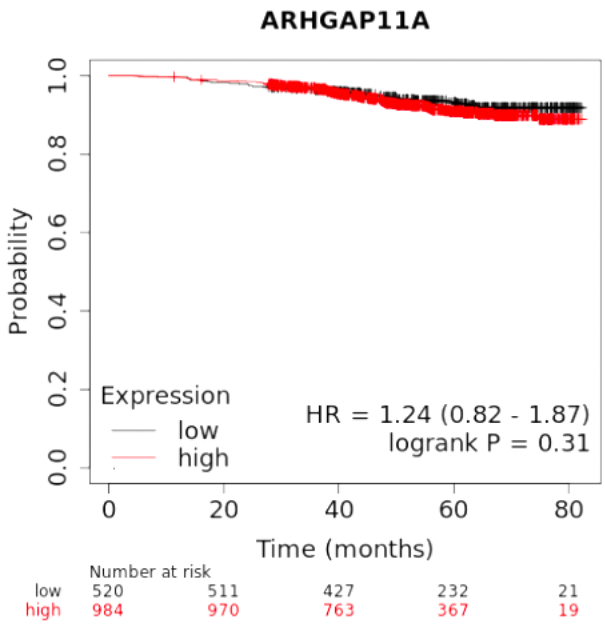

**RNAseq ID:** ARHGAP11A  
**Survival:** OS  
**Auto select best cutoff:** checked  
**Follow up threshold:** all  
**Censore at threshold:** checked  
**Compute median over entire database:** false  
**Cutoff value used in analysis:** -0.58  
**Expression range of the probe:** -3 - 2  
**Probe set option:** user selected probe set  
**Invert HR values below 1:** not checked

### Restrictions

Lymph node status: all  
 ER status: all  
 PGR status: all  
 HER2 status: all  
 KI67 status: all  
 Nottingham histologic grade: all  
 PAM50 subtype: LuminalB

### Cohorts

Endocrine treated: all  
 Chemo treated: all

### Results

**P value:** 0.039  
**FDR:** over 50%

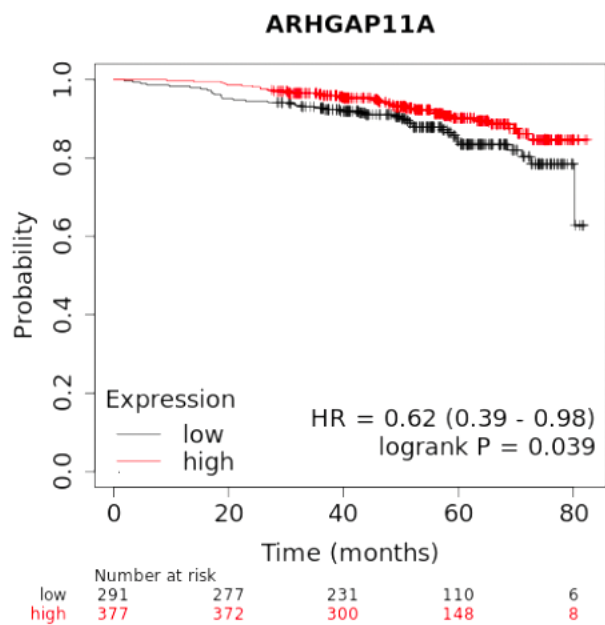

**RNAseq ID:** ARHGAP11A  
**Survival:** OS  
**Auto select best cutoff:** checked  
**Follow up threshold:** all  
**Censore at threshold:** checked  
**Compute median over entire database:** false  
**Cutoff value used in analysis:** -1.19  
**Expression range of the probe:** -3 - 1  
**Probe set option:** user selected probe set  
**Invert HR values below 1:** not checked

### Restrictions

Lymph node status: all  
 ER status: all  
 PGR status: all  
 HER2 status: all  
 KI67 status: all  
 Nottingham histologic grade: all  
 PAM50 subtype: Her2

### Cohorts

Endocrine treated: all  
 Chemo treated: all

### Results

**P value:** 0.1323  
**FDR:** 100%

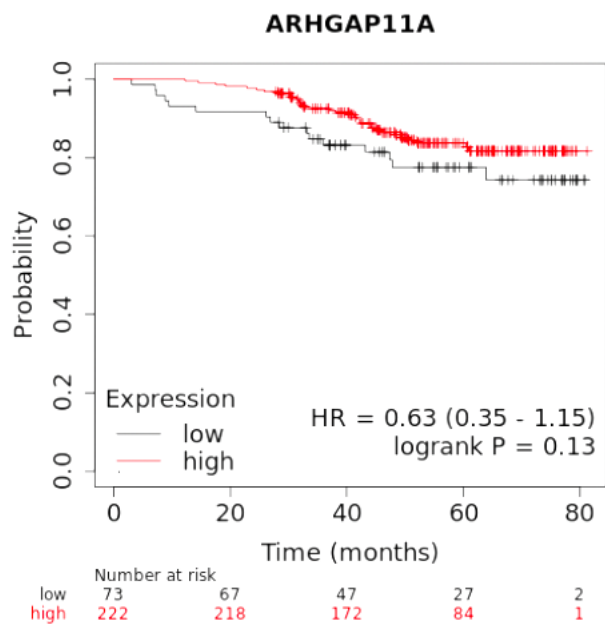

Supplement: f6 [file 8236853.f6.pdf]
