# Supplementary material for: Protooncogenic Role of ARHGAP11A and ARHGAP11B in Invasive Ductal Carcinoma: Two Promising Breast Cancer Biomarkers
Source: Hindawi journal article supplement (doi:10.1155/2023/8236853), 2023-01-01

**RNAseq ID:** ARHGAP11B =  
**Survival:** OS  
**Auto select best cutoff:** checked  
**Follow up threshold:** all  
**Censore at threshold:** checked  
**Compute median over entire database:** false  
**Cutoff value used in analysis:** 2.86  
**Expression range of the probe:** -1 - 5  
**Probe set option:** user selected probe set  
**Invert HR values below 1:** not checked

### Restrictions

Lymph node status: all  
 ER status: all  
 PGR status: all  
 HER2 status: all  
 KI67 status: all  
 Nottingham histologic grade: all  
 PAM50 subtype: all

### Cohorts

Endocrine treated: all  
 Chemo treated: all

### Results

**P value:** 0.0012  
**FDR:** over 50%

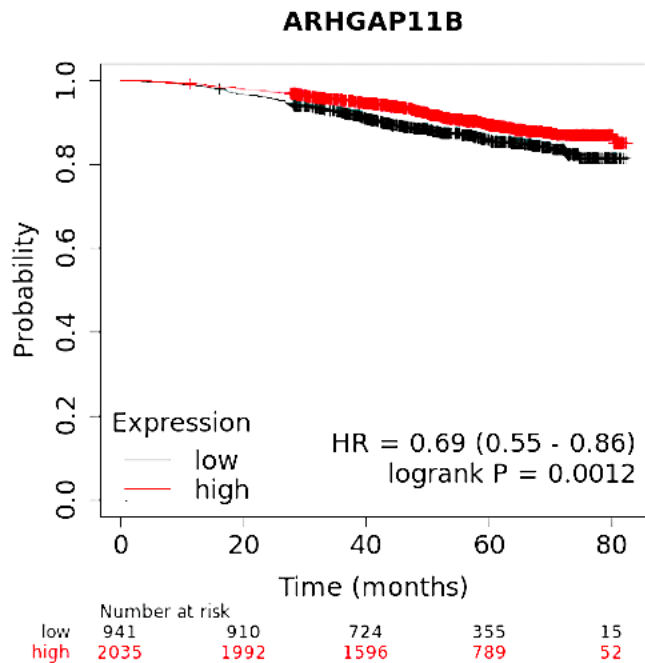

**RNAseq ID:** ARHGAP11B  
**Survival:** OS  
**Auto select best cutoff:** checked  
**Follow up threshold:** all  
**Censore at threshold:** checked  
**Compute median over entire database:** false  
**Cutoff value used in analysis:** 3.17  
**Expression range of the probe:** 2 - 5  
**Probe set option:** user selected probe set  
**Invert HR values below 1:** not checked

### Restrictions

Lymph node status: all  
 ER status: all  
 PGR status: all  
 HER2 status: all  
 KI67 status: all  
 Nottingham histologic grade: all  
 PAM50 subtype: Normal

### Cohorts

Endocrine treated: all  
 Chemo treated: all

### Results

**P value:** 0.3658  
**FDR:** 100%

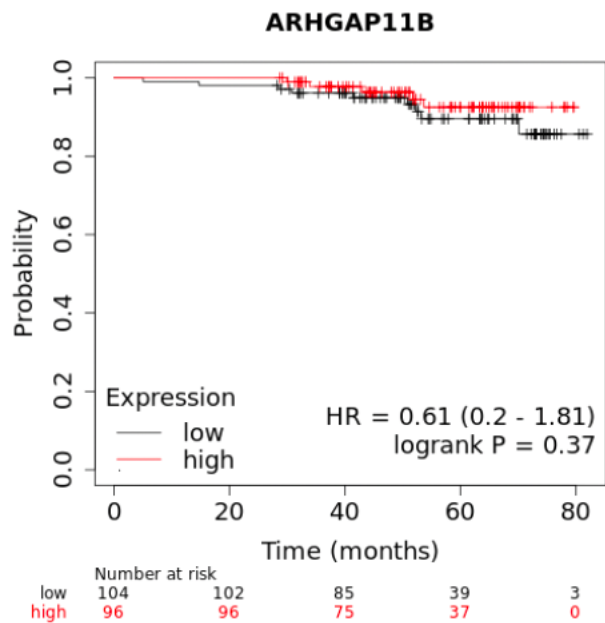

**RNAseq ID:** ARHGAP11B  
**Survival:** OS  
**Auto select best cutoff:** checked  
**Follow up threshold:** all  
**Censore at threshold:** checked  
**Compute median over entire database:** false  
**Cutoff value used in analysis:** 3.03  
**Expression range of the probe:** 1 - 4  
**Probe set option:** user selected probe set  
**Invert HR values below 1:** not checked

**Restrictions**

Lymph node status: all  
 ER status: all  
 PGR status: all  
 HER2 status: all  
 KI67 status: all  
 Nottingham histologic grade: all  
 PAM50 subtype: Basal

**Cohorts**

Endocrine treated: all  
 Chemo treated: all

**Results**

**P value:** 0.009  
**FDR:** over 50%

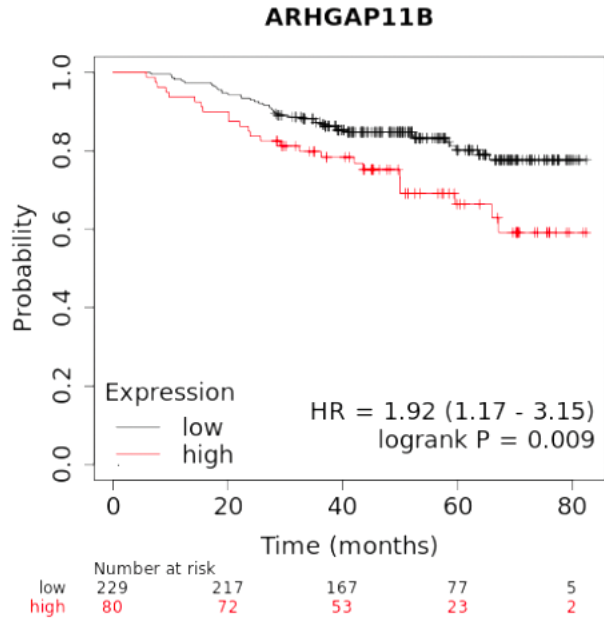

**RNAseq ID:** ARHGAP11B  
**Survival:** OS  
**Auto select best cutoff:** checked  
**Follow up threshold:** all  
**Censore at threshold:** checked  
**Compute median over entire database:** false  
**Cutoff value used in analysis:** 3.24  
**Expression range of the probe:** 1 - 5  
**Probe set option:** user selected probe set  
**Invert HR values below 1:** not checked

**Restrictions**

Lymph node status: all  
 ER status: all  
 PGR status: all  
 HER2 status: all  
 KI67 status: all  
 Nottingham histologic grade: all  
 PAM50 subtype: LuminalA

**Cohorts**

Endocrine treated: all  
 Chemo treated: all

**Results**

**P value:** 0.0686  
**FDR:** 100%

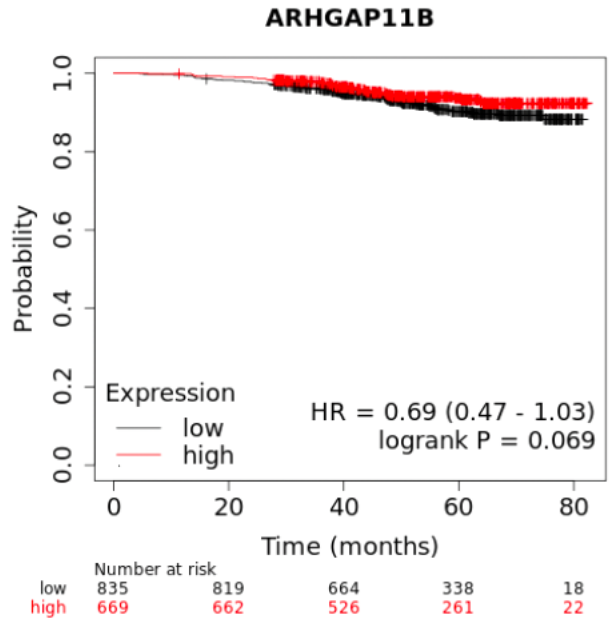

**RNAseq ID:** ARHGAP11B  
**Survival:** OS  
**Auto select best cutoff:** checked  
**Follow up threshold:** all  
**Censore at threshold:** checked  
**Compute median over entire database:** false  
**Cutoff value used in analysis:** 2.77  
**Expression range of the probe:** -1 - 5  
**Probe set option:** user selected probe set  
**Invert HR values below 1:** not checked

### Restrictions

Lymph node status: all  
 ER status: all  
 PGR status: all  
 HER2 status: all  
 KI67 status: all  
 Nottingham histologic grade: all  
 PAM50 subtype: LuminalB

### Cohorts

Endocrine treated: all  
 Chemo treated: all

### Results

**P value:** 0.0215  
**FDR:** over 50%

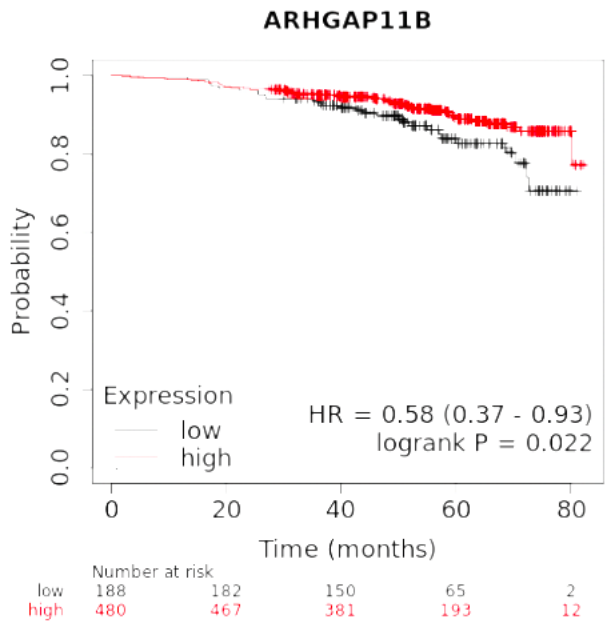

**RNAseq ID:** ARHGAP11B  
**Survival:** OS  
**Auto select best cutoff:** checked  
**Follow up threshold:** all  
**Censore at threshold:** checked  
**Compute median over entire database:** false  
**Cutoff value used in analysis:** 3.21  
**Expression range of the probe:** 2 - 5  
**Probe set option:** user selected probe set  
**Invert HR values below 1:** not checked

**Restrictions**

Lymph node status: all  
 ER status: all  
 PGR status: all  
 HER2 status: all  
 KI67 status: all  
 Nottingham histologic grade: all  
 PAM50 subtype: Her2

**Cohorts**

Endocrine treated: all  
 Chemo treated: all

**Results**

**P value:** 0.0354  
**FDR:** over 50%

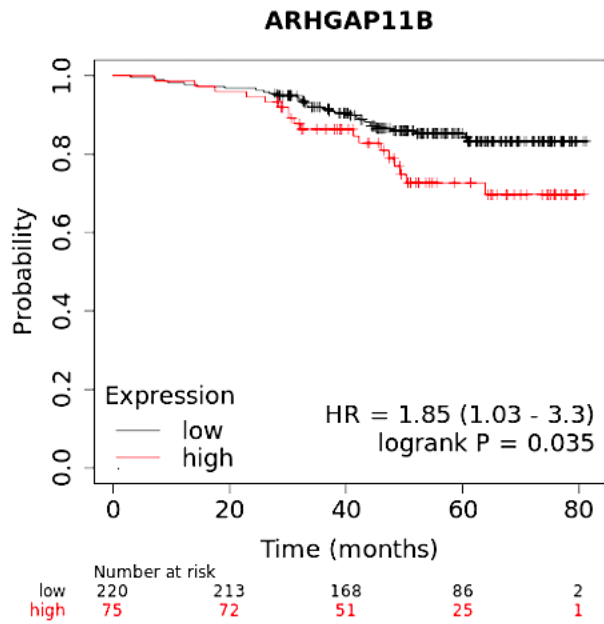

Supplement: f7 [file 8236853.f7.pdf]
