# Supplementary material for: Protooncogenic Role of ARHGAP11A and ARHGAP11B in Invasive Ductal Carcinoma: Two Promising Breast Cancer Biomarkers
Source: Hindawi journal article supplement (doi:10.1155/2023/8236853), 2023-01-01
Supplement: f1 [file 8236853.f1.pdf]

a-1) ARHGAP11A Isoform expression in TCGA-BRCA

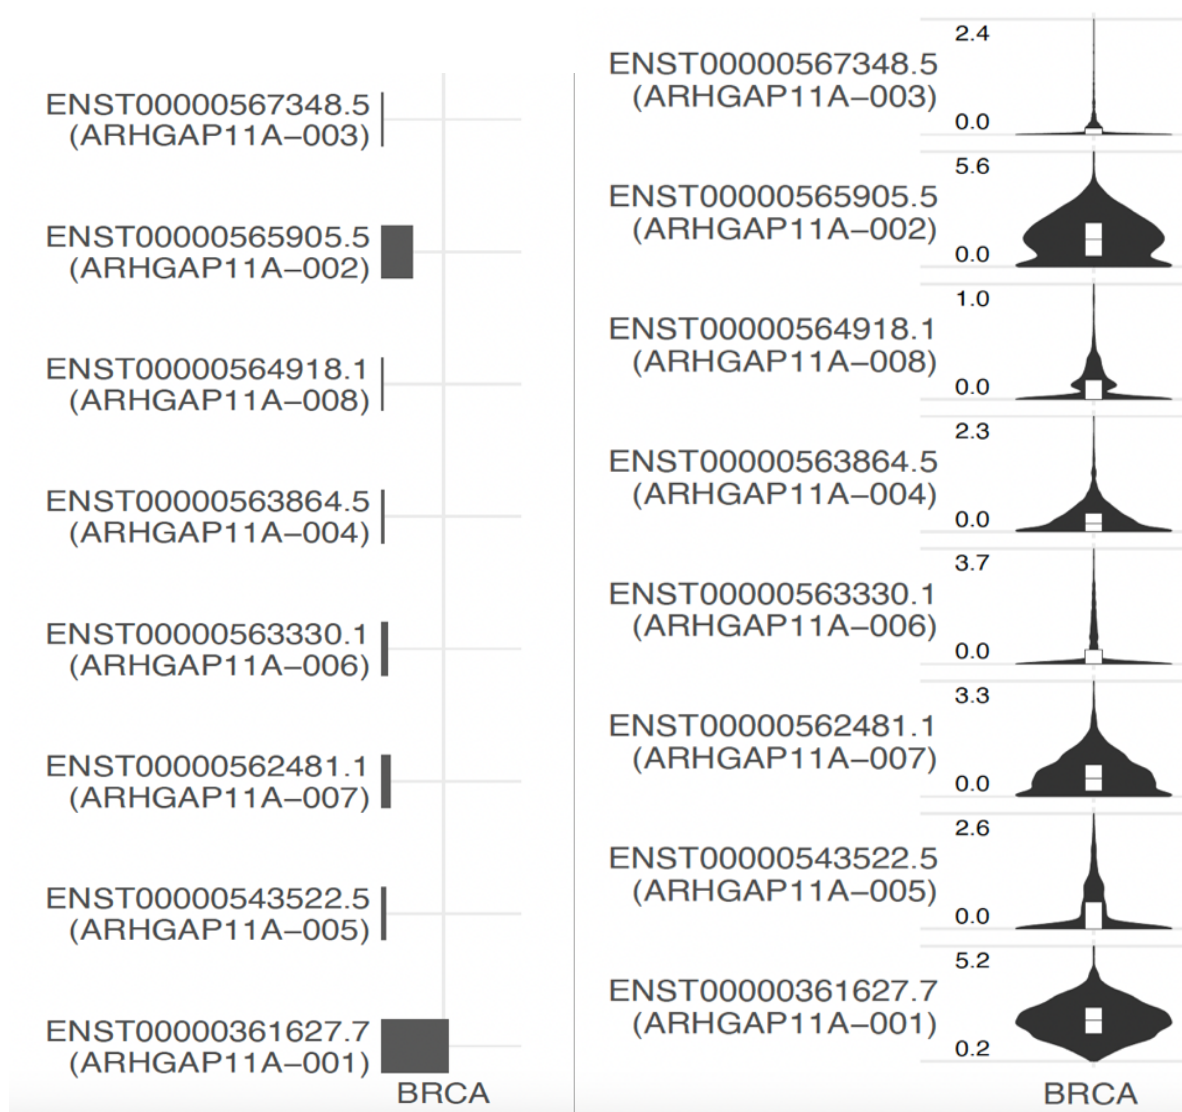

a-2) The correlation between the ARHGAP11A expression (ENST00000361627.7 isoform) (transcript-level) and DNA methylation in all individual CpGs

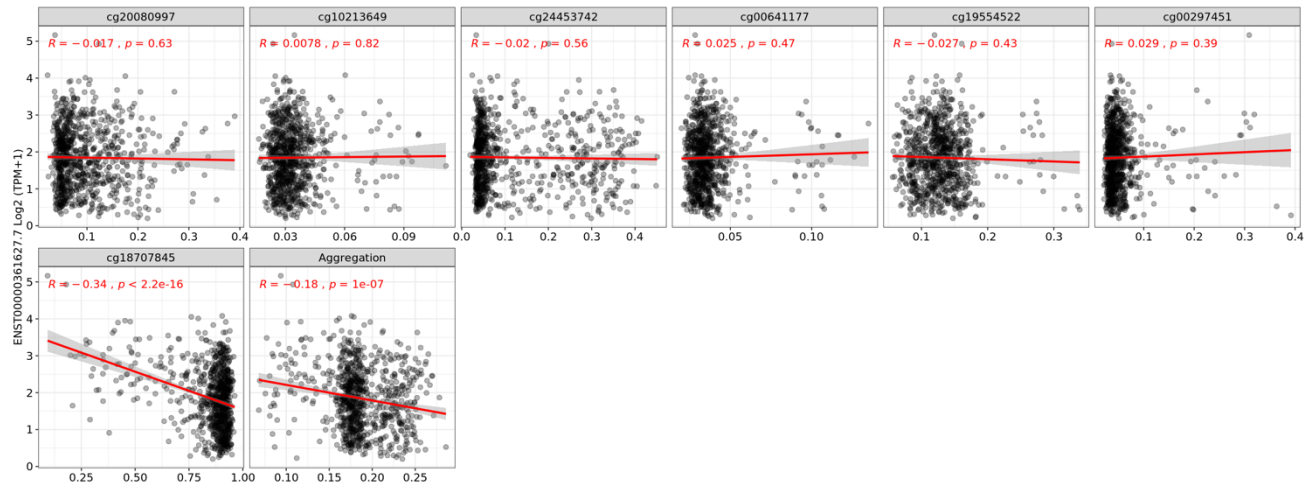

a-3) Probes used for the individual CpGs of ARHGAP11A

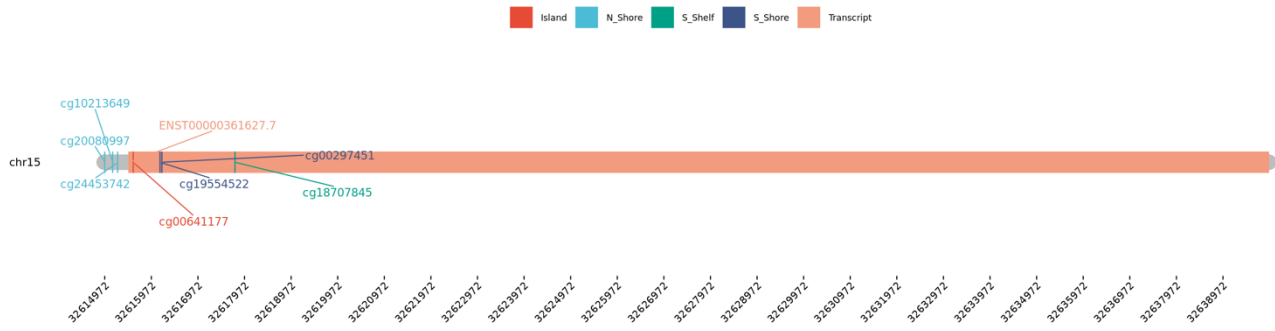

| Probe      | CGIposition | Distance_To_TSS |
|------------|-------------|-----------------|
| cg20080997 | N_Shore     | 518             |
| cg10213649 | N_Shore     | 349             |
| cg24453742 | N_Shore     | 241             |
| cg00641177 | Island      | -93             |
| cg19554522 | S_Shore     | -668            |
| cg00297451 | S_Shore     | -709            |
| cg18707845 | S_Shelf     | -2277           |

b-1) ARHGAP11B Isoform expression in TCGA-BRCA

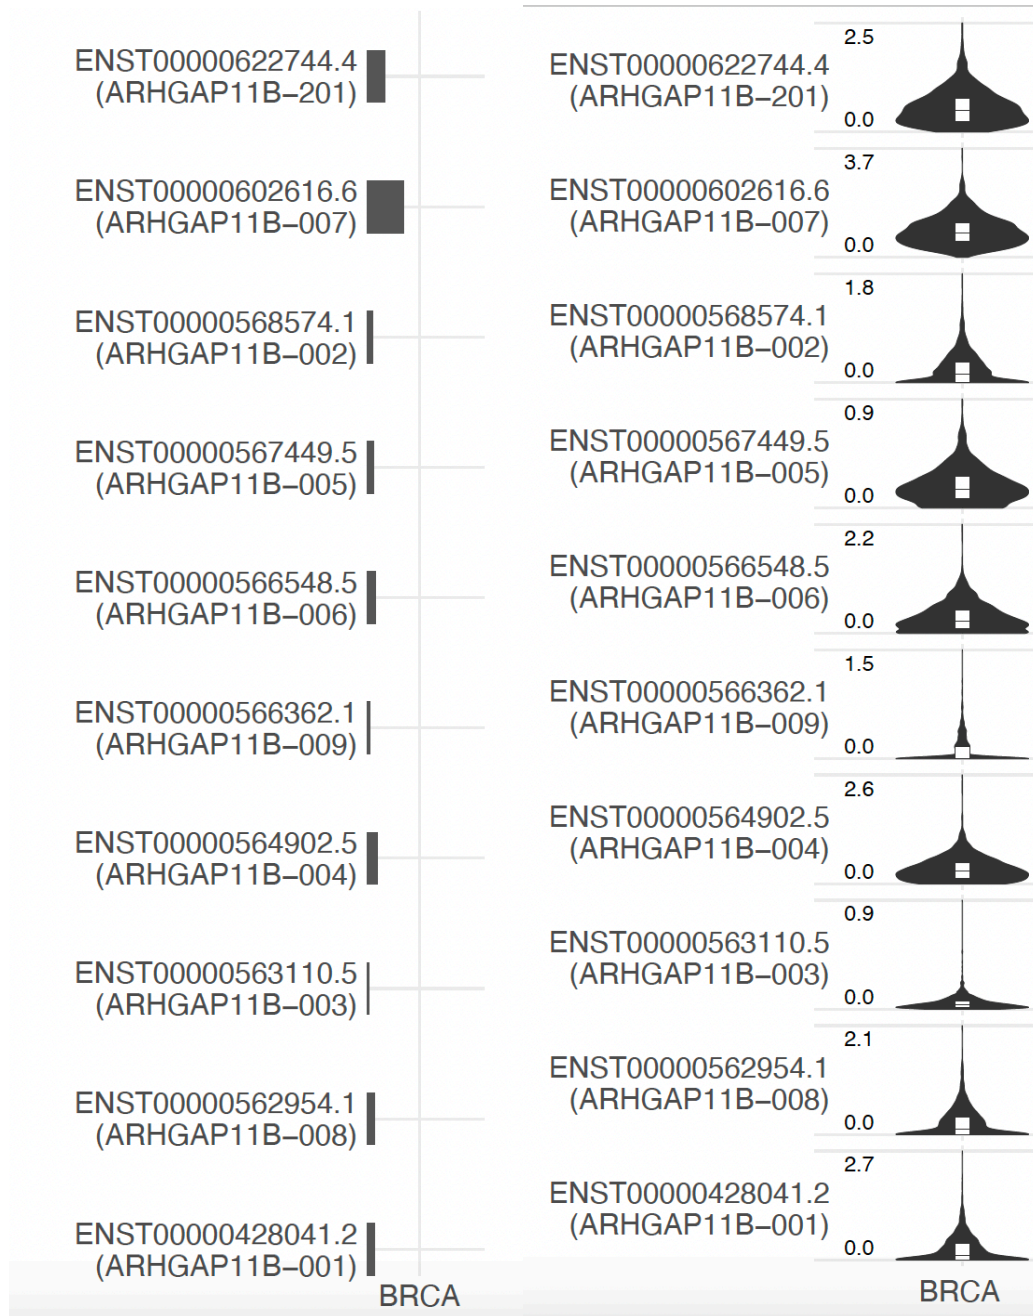

b-2) The correlation between the ARHGAP11B expression (ENST00000602616.6 isoform) (transcript-level) and DNA methylation in all individual CpGs

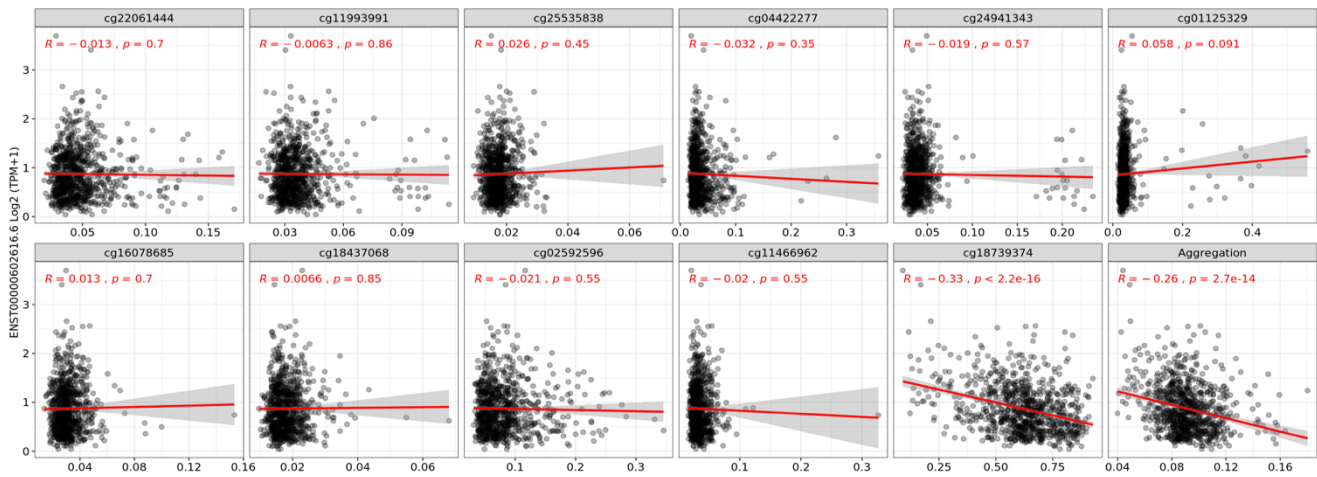

B-3) Probes used for the individual CpGs of ARHGAP11B

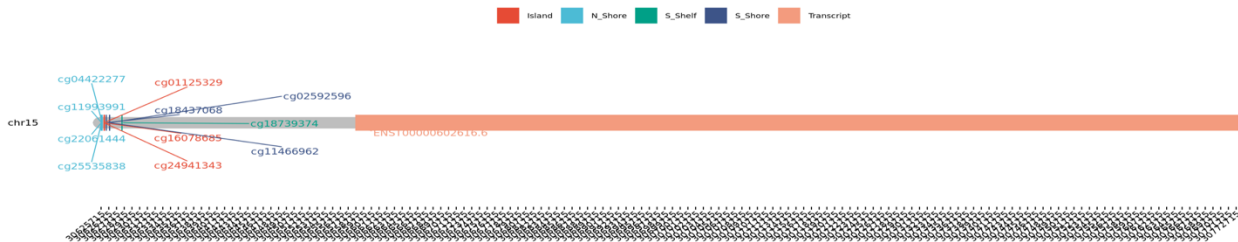

| Probe      | CGIposition | Distance To TSS |
|------------|-------------|-----------------|
| cg22061444 | N_Shore     | 33002           |
| cg11993991 | N_Shore     | 32962           |
| cg25535838 | N_Shore     | 32929           |
| cg04422277 | N_Shore     | 32855           |
| cg24941343 | Island      | 32607           |
| cg01125329 | Island      | 32592           |
| cg16078685 | Island      | 32581           |
| cg18437068 | S_Shore     | 32325           |
| cg02592596 | S_Shore     | 31906           |
| cg11466962 | S_Shore     | 31900           |
| cg18739374 | S_Shelf     | 30293           |
