# Supplementary material for: Protooncogenic Role of ARHGAP11A and ARHGAP11B in Invasive Ductal Carcinoma: Two Promising Breast Cancer Biomarkers
Source: Hindawi journal article supplement (doi:10.1155/2023/8236853), 2023-01-01
Supplement: f3 [file 8236853.f3.pdf]

## BP

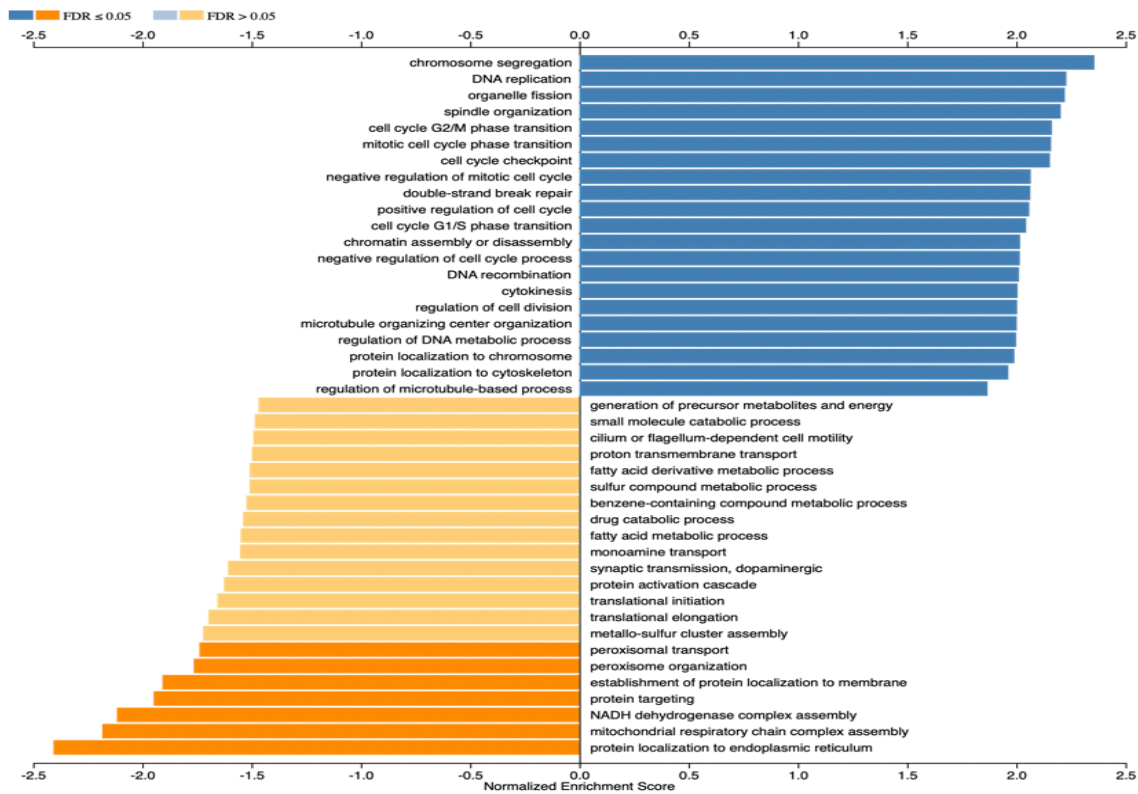

## KEGG

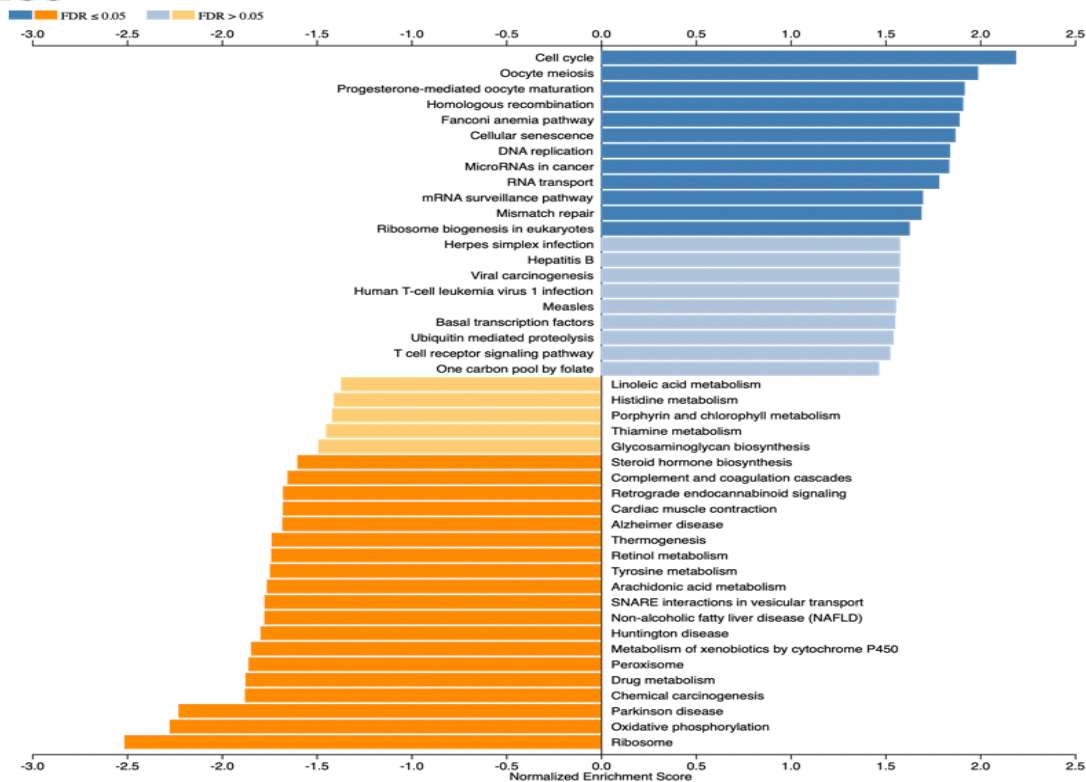

Supplementary File S3 BP and KEGG pathways involved in negatively (orange) and positively co-expressed (blue) genes with *ARHGAP11B* in TCGA-BRCA, respectively.
