# Supplementary material for: Protooncogenic Role of ARHGAP11A and ARHGAP11B in Invasive Ductal Carcinoma: Two Promising Breast Cancer Biomarkers
Source: Hindawi journal article supplement (doi:10.1155/2023/8236853), 2023-01-01
Supplement: f4 [file 8236853.f4.pdf]

**Table 1. GSEA: BPs related to positively co-expressed genes to ARHGAP11A and ARHGAP11B**

| <b>BPs related to positively correlated genes found only in ARHGAP11A</b> | <b>Common BPs related to positively correlated genes found in both ARHGAP11A and ARHGAP11B</b> | <b>BPs related to positively correlated genes found only in ARHGAP11B</b> |
|---------------------------------------------------------------------------|------------------------------------------------------------------------------------------------|---------------------------------------------------------------------------|
| Telomer organization                                                      | Chromosome segregation                                                                         | Organelle fission                                                         |
| Regulation of chromosome organization                                     | DNA replication                                                                                | Negative regulation of mitotic cell cycle                                 |
| Signal transduction in response to DNA damage                             | Spindle organization                                                                           | Regulation of cell division                                               |
| RNA localization                                                          | Cell cycle G2/M phase transition                                                               | Regulation of DNA metabolic process                                       |
| Female gamete generation                                                  | Mitotic cell cycle phase transition                                                            | Protein localization to cytoskeleton                                      |
|                                                                           | Cell cycle checkpoint                                                                          |                                                                           |
|                                                                           | Double-strand break repair                                                                     |                                                                           |
|                                                                           | Positive regulation of cell cycle                                                              |                                                                           |
|                                                                           | Cell cycle G1/S phase transition                                                               |                                                                           |
|                                                                           | Chromatin assembly or disassembly                                                              |                                                                           |
|                                                                           | Negative regulation of cell cycle process                                                      |                                                                           |
|                                                                           | DNA recombination                                                                              |                                                                           |
|                                                                           | cytokinesis                                                                                    |                                                                           |
|                                                                           | Microtubule organizing center organization                                                     |                                                                           |
|                                                                           | Protein localization to chromosome                                                             |                                                                           |
|                                                                           | Regulation of microtubule-based process                                                        |                                                                           |

**Table 2. GSEA: BPs related to negatively co-expressed genes to ARHGAP11A and ARHGAP11B**

| <b>BPs related to negatively correlated genes found only in ARHGAP11A</b> | <b>BPs related to negatively correlated genes found in both ARHGAP11A and ARHGAP11B</b> | <b>BPs related to negatively correlated genes found only in ARHGAP11B</b> |
|---------------------------------------------------------------------------|-----------------------------------------------------------------------------------------|---------------------------------------------------------------------------|
|                                                                           |                                                                                         | Protein localization to endoplasmic reticulum                             |
|                                                                           |                                                                                         | Peroxisome organization                                                   |
|                                                                           |                                                                                         | Peroxisomal transport                                                     |
|                                                                           |                                                                                         | Establishment of protein localization to membrane                         |
| Protein activation cascade                                                |                                                                                         | Protein targeting                                                         |
| Extracellular structure organization                                      |                                                                                         | NADH dehydrogenase complex assembly                                       |

|                         |  |                                                  |
|-------------------------|--|--------------------------------------------------|
| Renal system process    |  | Mitochondrial respiratory chain complex assembly |
| Endothelium development |  |                                                  |

**Table 3. GSEA: KEGG pathways related to positively co-expressed genes to ARHGAP11A and ARHGAP11B**

| <b>KEGGs related to positively correlated genes found only in ARHGAP11A</b> | <b>Common KEGGs related to positively correlated genes found in both ARHGAP11A and ARHGAP11B</b> | <b>KEGGs related to positively correlated genes found only in ARHGAP11B</b> |
|-----------------------------------------------------------------------------|--------------------------------------------------------------------------------------------------|-----------------------------------------------------------------------------|
| P53 signaling pathway                                                       | Cell cycle                                                                                       |                                                                             |
| Pyrimidine metabolism                                                       | Oocyte meiosis                                                                                   |                                                                             |
| Aminoacyl-tRNA biosynthesis                                                 | Progesterone-mediated oocyte maturation                                                          |                                                                             |
| Epstein-Barr virus infection                                                | Homologous recombination                                                                         |                                                                             |
| Proteasome                                                                  | Fanconi anemia pathway                                                                           |                                                                             |
| Spliceosome                                                                 | Cellular senescence                                                                              |                                                                             |
| Hepatitis B                                                                 | DNA replication                                                                                  |                                                                             |
| Viral carcinogenesis                                                        | microRNAs in cancer                                                                              |                                                                             |
| Human T-cell leukemia virus 1 infection                                     | RNA transport                                                                                    |                                                                             |
| One carbon pool by folate                                                   | mRNA surveillance pathway                                                                        |                                                                             |
|                                                                             | Mismatch repair                                                                                  |                                                                             |
|                                                                             | Ribosome biogenesis in eukaryotes                                                                |                                                                             |

**Table 4. GSEA: KEGG pathways related to negatively co-expressed genes to ARHGAP11A and ARHGAP11B**

| <b>KEGGs related to negatively correlated genes found only in ARHGAP11A</b> | <b>Common KEGGs related to negatively correlated genes found in both ARHGAP11A and ARHGAP11B</b> | <b>KEGGs related to negatively correlated genes found only in ARHGAP11B</b> |
|-----------------------------------------------------------------------------|--------------------------------------------------------------------------------------------------|-----------------------------------------------------------------------------|
|                                                                             | Complement and coagulation cascades                                                              | Steroid hormone biosynthesis                                                |
|                                                                             | Arachidonic acid metabolism                                                                      | Retinol metabolism                                                          |
|                                                                             | Metabolism of xenobiotics by cytochrome P450                                                     | Tyrosine metabolism                                                         |
|                                                                             | Peroxisome                                                                                       | Retrograde endocannabinoid signaling                                        |
|                                                                             | Drug metabolism                                                                                  | Cardiac muscle contraction                                                  |
|                                                                             | Chemical carcinogenesis                                                                          | Alzheimer disease                                                           |
|                                                                             |                                                                                                  | Thermogenesis                                                               |
|                                                                             |                                                                                                  | SNARE interaction in vesicular transport                                    |
|                                                                             |                                                                                                  | Non-alcoholic fatty liver disease (NAFLD)                                   |

|  |  |                           |
|--|--|---------------------------|
|  |  | Huntington disease        |
|  |  | Parkinson disease         |
|  |  | Oxidative phosphorylation |
|  |  | ribosome                  |
