# Supplementary material for: Protooncogenic Role of ARHGAP11A and ARHGAP11B in Invasive Ductal Carcinoma: Two Promising Breast Cancer Biomarkers
Source: Hindawi journal article supplement (doi:10.1155/2023/8236853), 2023-01-01
Supplement: f5 [file 8236853.f5.pdf]

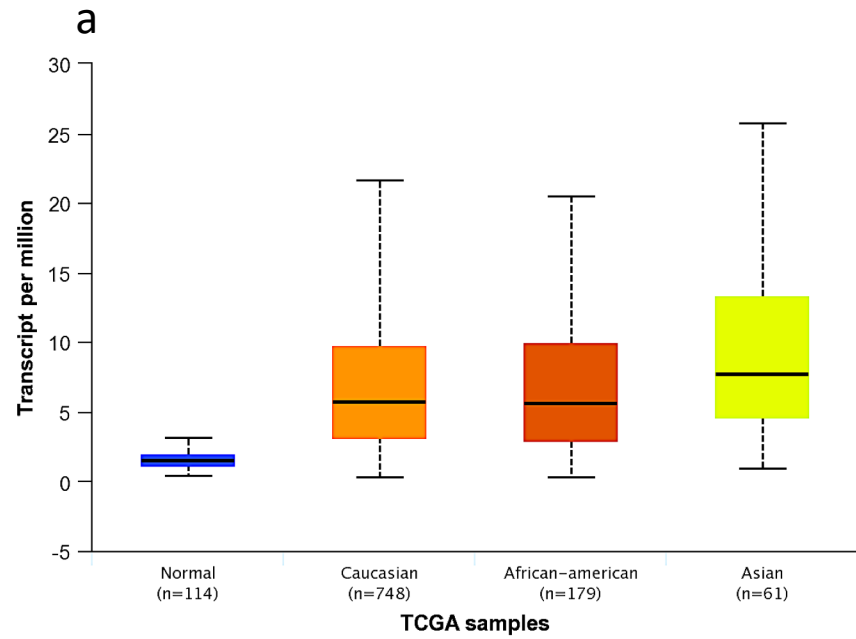

| Comparison                   | Statistical significance |
|------------------------------|--------------------------|
| Normal-vs-Caucasian          | 1.6E-12                  |
| Normal-vs-AfricanAmerican    | 1.6E-12                  |
| Normal-vs-Asian              | 1.3E-07                  |
| Caucasian-vs-AfricanAmerican | 8.2E-01                  |
| Caucasian-vs-Asian           | 6.6E-02                  |
| AfricanAmerican-vs-Asian     | 6.2E-02                  |

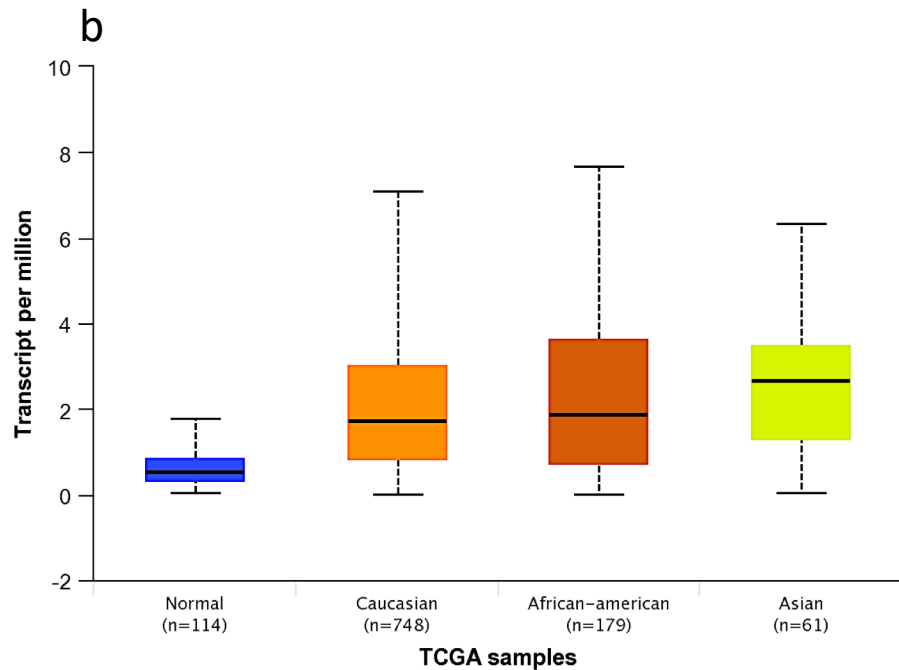

| Comparison                   | Statistical significance |
|------------------------------|--------------------------|
| Normal-vs-Caucasian          | <1E-12                   |
| Normal-vs-AfricanAmerican    | 1.6E-12                  |
| Normal-vs-Asian              | 3.5E-05                  |
| Caucasian-vs-AfricanAmerican | 7.3E-01                  |
| Caucasian-vs-Asian           | 2.9E-01                  |
| AfricanAmerican-vs-Asian     | 3.8E-01                  |
